# Supplementary material for: Self-polymerization of Meldrum's acid-amine compounds: an effective route to polyamides
Source: Royal Society of Chemistry journal article supplement (doi:10.1039/d0py01341b), 2020-11-23
Supplement: d0py01341b1.pdf [file d0py01341b1.pdf]

## Electronic supplementary information (ESI)

### Self-polymerization of Meldrum's acid-amine compounds: an effective route for polyamides

Chien-Ho Huang and Ying-Ling Liu\*

Department of Chemical Engineering, National Tsing Hua University,

No. 101, Sec. 2, Kuang-Fu Road, Hsinchu, 30013, Taiwan.

\*E-mail: [liuyl@mx.nthu.edu.tw](mailto:liuyl@mx.nthu.edu.tw)

#### Supporting Figures and Tables

Spectral analysis results and DSC measurements of the prepared MA-amine compounds are shown in Figures S1 – S4.

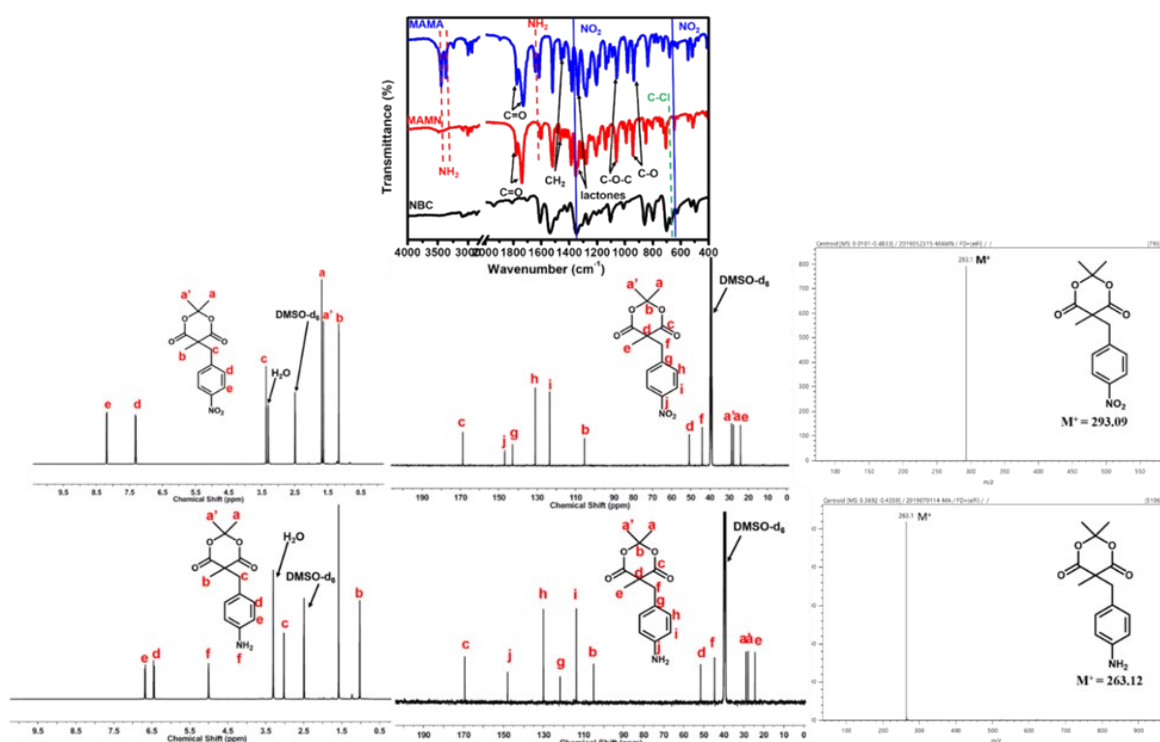

Figure S1. FTIR,  $^1\text{H-NMR}$ ,  $^{13}\text{C-NMR}$ , LRFD-MS spectrum of MAMN and MAMA.

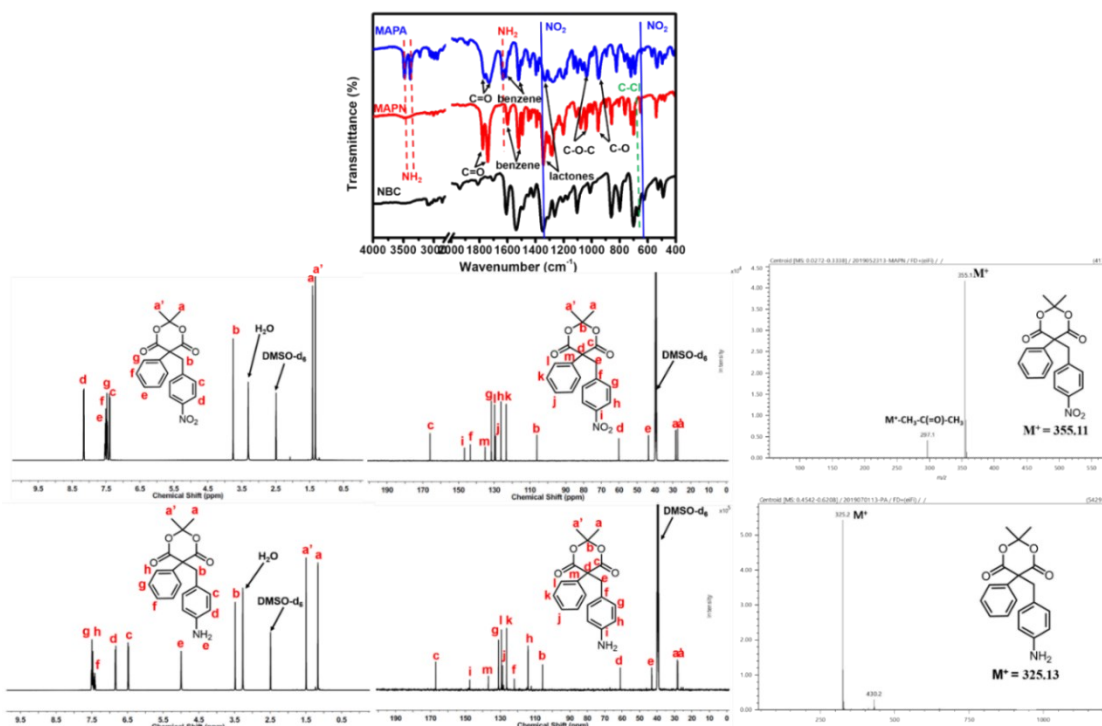

Figure S2. FTIR,  $^1\text{H-NMR}$ ,  $^{13}\text{C-NMR}$ , LRFD-MS spectrum of MAPN and MAPA.

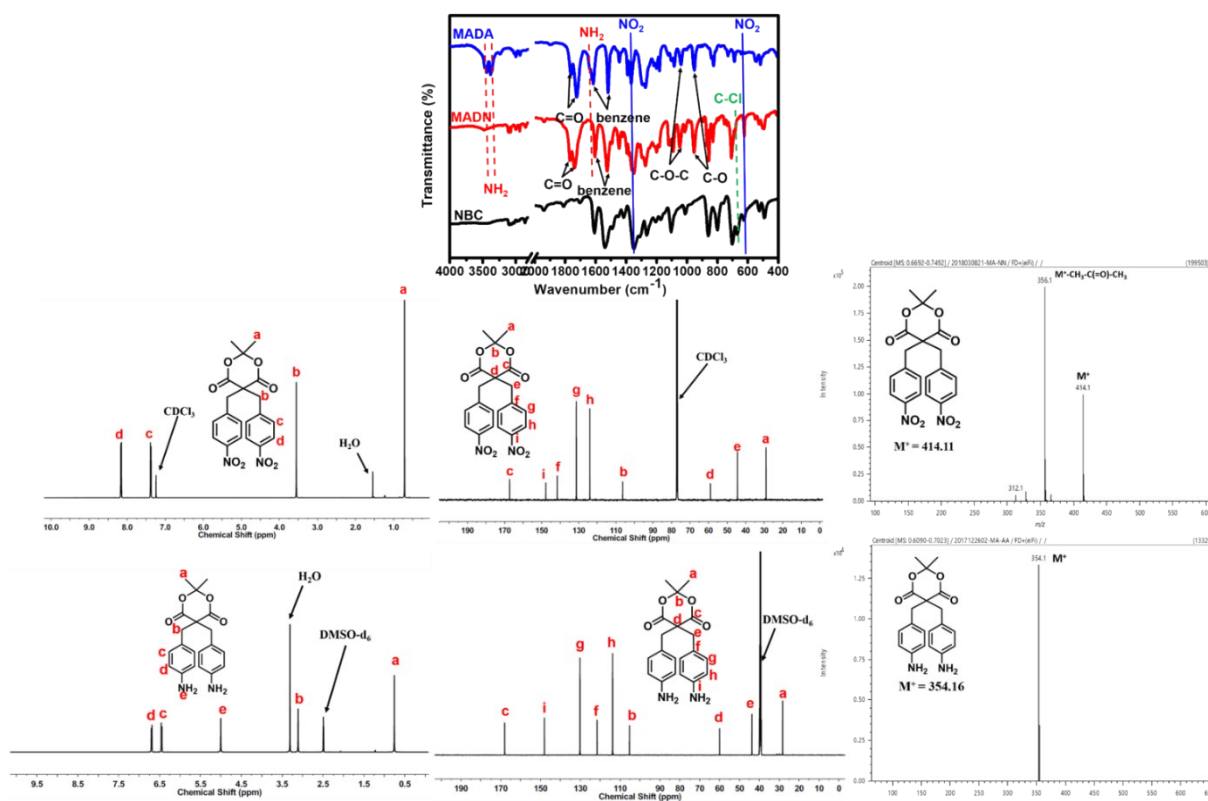

Figure S3. FTIR,  $^1\text{H-NMR}$ ,  $^{13}\text{C-NMR}$ , LRFD-MS spectrum of MADN and MADA.

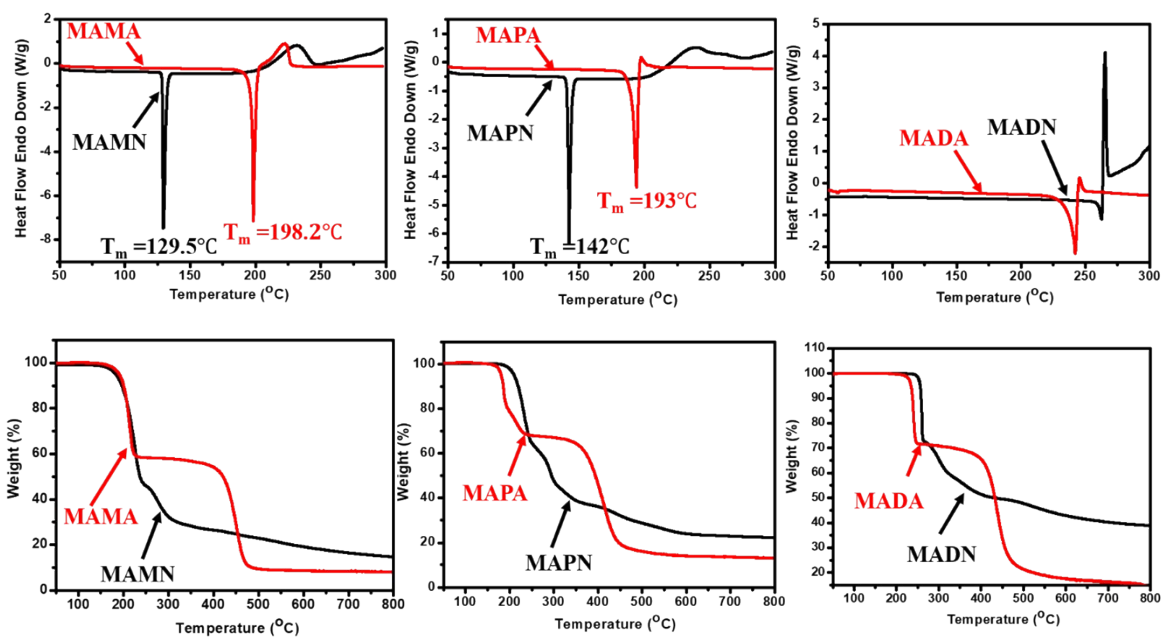

**Figure S4.** DSC (upper) and TGA thermograms (lower) of A-B type MA-amine compounds.

Instrumental analysis results of the prepared polyamides are shown in Figures S5 – S11.

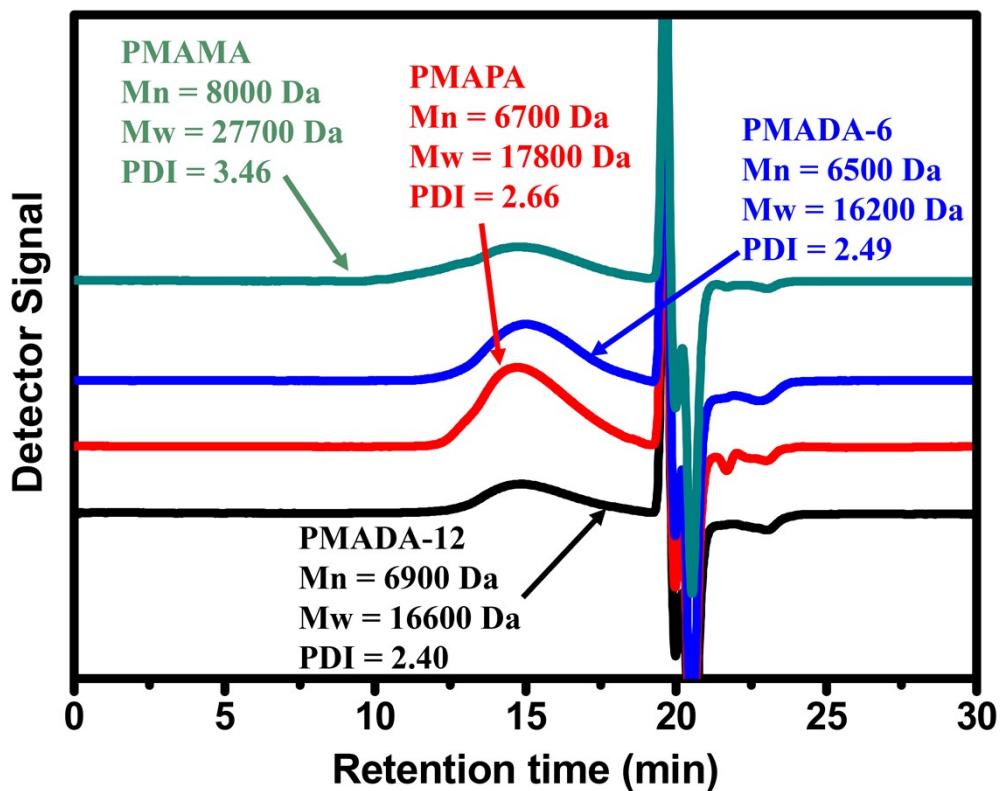

Figure S5. GPC chromatogram of prepared polyamides.

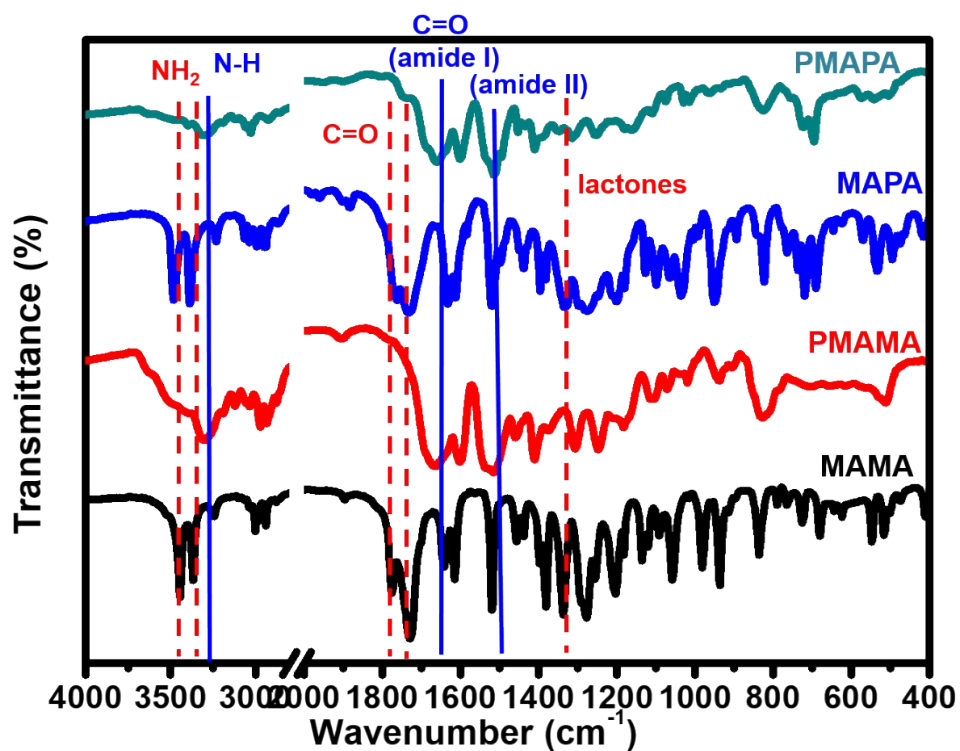

Figure S6. FTIR spectra of the prepared linear polyamides PMAMA and PMAPA.

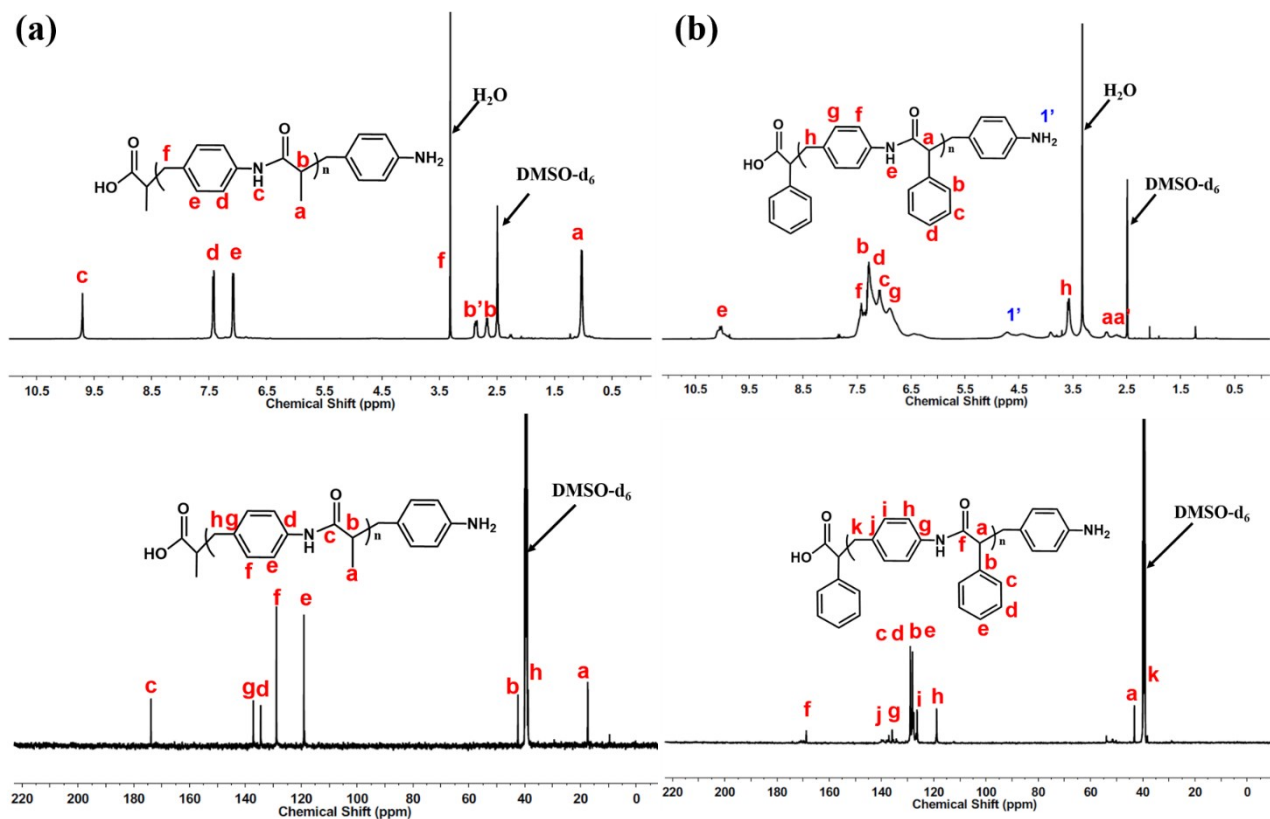

Figure S7.  $^1\text{H}$ -NMR (upper) and  $^{13}\text{C}$ -NMR (lower) spectrum of (a) PMAMA, (b) PMAPA.

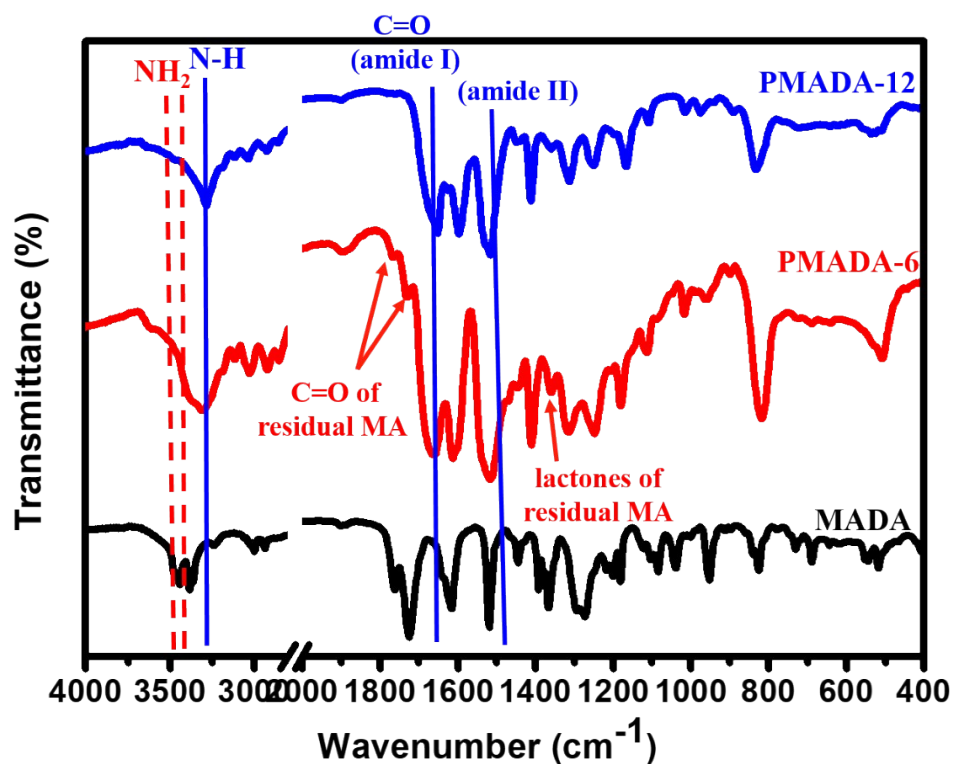

Figure S8. FTIR spectra of the prepared hyperbranched polyamides PMADA-6 and PMADA-12.

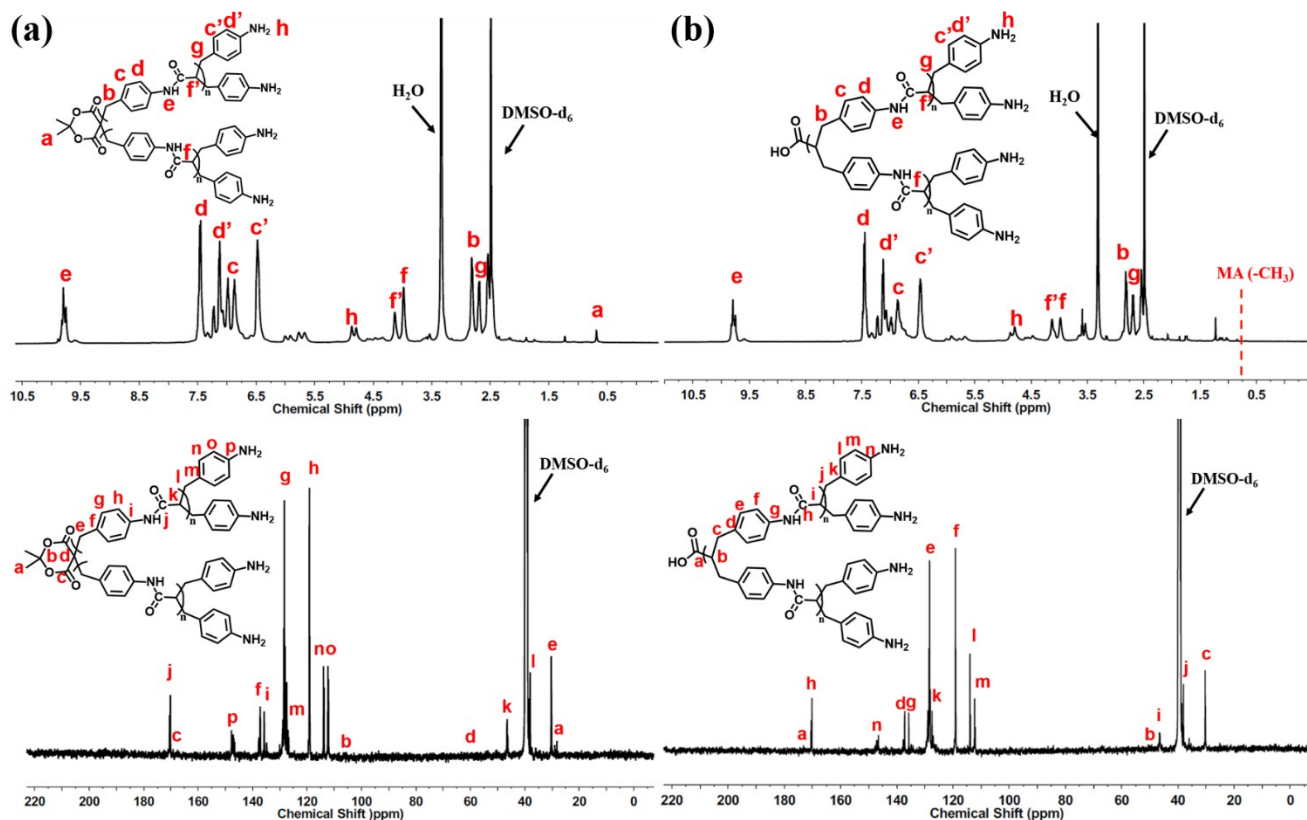

Figure S9. NMR spectra of hyperbranched polyamides PMADA-6 and PMADA-12.

Figure S10. DSC (left) and TGA thermograms (right) of prepared polyamides.

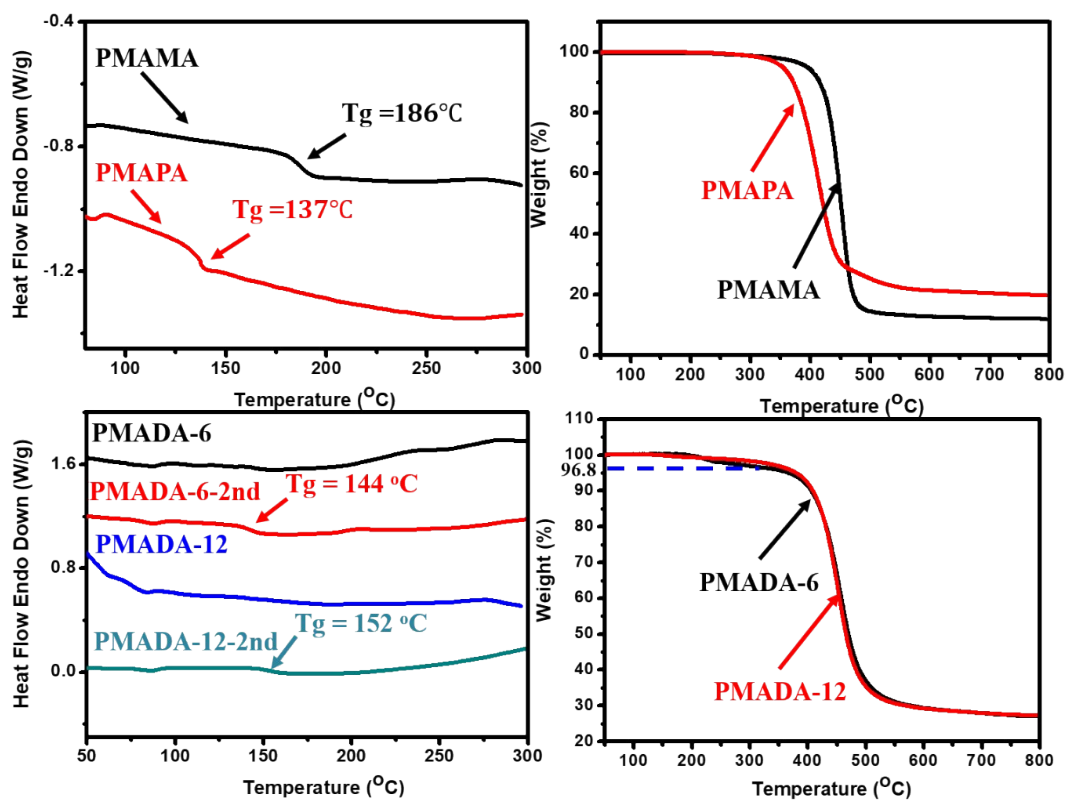

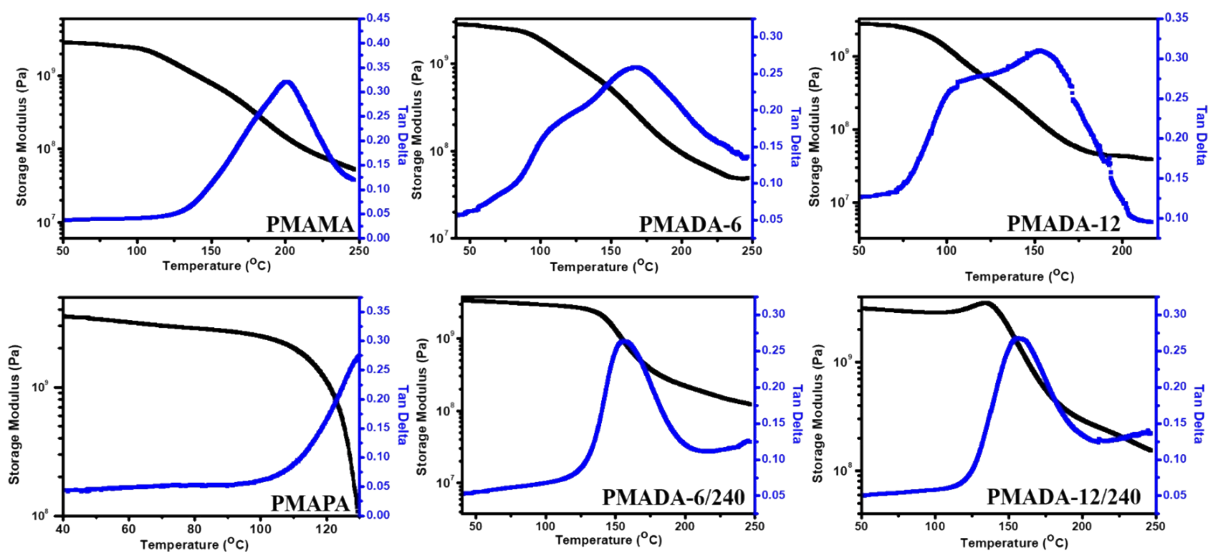

**Figure S11.** DMA thermogram of PMAMA, PMAPA, PMADA-6, PMADA-6/240, PMADA-12, and PMADA-12/240.
